# Supplementary material for: Iron(iii) amine-bis(phenolate) complexes as catalysts for the coupling of alkyl halides with aryl Grignard reagents
Source: Royal Society of Chemistry journal article supplement (doi:10.1039/b713647a), 2007-11-23
Supplement: b713647a.pdf [file b713647a.pdf]

**Iron(III) amine-bis(phenolate) complexes as catalysts for  
coupling of alkyl halides with aryl Grignard reagents**

SUPPORTING INFORMATION

Rajoshree Roy Chowdhury, Angela K. Crane, Candace Fowler, Philip Kwong  
and Christopher M. Kozak\*

Memorial University of Newfoundland, Department of Chemistry, Centre for Green Chemistry  
and Catalysis, St. John's, Newfoundland, Canada A1B 3X7. E-mail: ckozak@mun.ca

**Experimental details, crystallographic data for L1H<sub>2</sub> and 1, characterization data (GC and  
NMR) for cross-coupled products.**

**General experimental conditions:** Unless otherwise stated, all manipulations were performed under an atmosphere of dry oxygen-free nitrogen by means of standard Schlenk or glove box techniques. Anhydrous diethyl ether and THF was stored over sieves and distilled from sodium benzophenone ketyl under nitrogen. Reagents were purchased either from Aldrich or Alfa Aesar and used without further purification. Grignard reagents were titrated prior to use, and were also analyzed by GC-MS after being quenched with dilute HCl(aq) to quantify biaryl complexes or other impurities present prior to their use in catalyst runs. High purity anhydrous FeCl<sub>3</sub> (99.99+%) was purchased in ampoules from Aldrich.

**Instrumentation:** NMR spectra were recorded in CDCl<sub>3</sub> on a Bruker Avance-500. MALDI-TOF MS spectra were recorded on an Applied Biosystems Voyager DE-PRO equipped with a reflectron, delayed ion extraction and high performance nitrogen laser (337 nm). Samples were prepared at a concentration of 0.03 mg L<sup>-1</sup> in methanol. Anthracene was used as the matrix, which was mixed at a concentration of 0.03 mg L<sup>-1</sup>. FTIR spectra were recorded on a Bruker TENSOR 27 spectrometer fitted with a MIRacle ATR with a zinc selenide crystal on which the samples are placed. UV-vis spectra were recorded on an Agilent 8453 spectrophotometer. Elemental analyses were carried out by Guelph Chemical

Laboratories, Guelph, ON, Canada. Crystal structures were solved on a AFC8-Saturn 70 single crystal X-ray diffractometer from Rigaku/MSK, equipped with an X-stream 2000 low temperature system. Gas chromatography mass spectrometry (GC-MS) analyses were performed using an Agilent Technologies 6890N Network GC system coupled to an Agilent Technologies 5973 mass selective detector (MSD). The chromatograph is equipped with electronic pressure control, split/splitless and on-column injectors (7683 Series), and a DB5-MS column. All catalytic reactions were performed on a Radleys Carousel Reactor<sup>TM</sup>. Twelve 45 mL reaction tubes were fitted with threaded Teflon caps equipped with valves for connection to the inert gas or vacuum supply of Schlenk apparatus, and septa for the introduction of reagents.

### $\text{H}_2[\text{O}_2\text{NO}]^{\text{BuMeFur}}$ (**L1H<sub>2</sub>**):

A solution of 2-*t*-butyl,4-methylphenol (20.236 g, 0.1232 mol), tetrahydrofurfurylamine (6.563 g, 0.0616 mol), and 37% aqueous formaldehyde (9.17 mL, 0.1232 mol) in methanol (50 mL) was stirred and refluxed for 72 h. Upon cooling, the reaction mixture separated into two phases. The upper phase was decanted, and the remaining oily residue was triturated with cold methanol to give a pure, white powder (15.37 g, 55% yield). The methanol washings were combined with the decanted upper phase from the reaction and concentrated *in vacuo* until a further 7.00 g of product precipitated from solution. A total yield of ca. 80% was thus obtained. Large single crystals suitable for X-ray diffraction studies were obtained by cooling of a hot diethyl ether solution.

<sup>1</sup>H NMR (500 MHz, CDCl<sub>3</sub>, δ): 8.29 (s, 2H, -OH<sup>h</sup>); 7.03 (s, ArH<sup>j</sup>, 2H,); 6.74 (s, ArH<sup>i</sup>, 2H,); 4.23 (m, CH<sup>d</sup>, 1H,); 4.00 (m, CH<sub>2</sub><sup>f</sup>, 2H,); 3.73 (s, CH<sub>2</sub><sup>c</sup>, 4H); 2.60 (m, CH<sub>2</sub><sup>e</sup>, 2H,); 2.26 (s, CH<sub>3</sub><sup>b</sup>, 6H); 1.92 (m, CH<sub>2</sub><sup>g</sup>, 4H); 1.43 (s, CH<sub>3</sub><sup>a</sup>, 18H,). IR (cm<sup>-1</sup>): 3350 (OH); 2955 (C-H); 1603 (C=C, phenyl ring). Anal. Calcd for C<sub>29</sub>H<sub>43</sub>NO<sub>3</sub>: C, 76.78; H, 9.55; N, 3.09. Found C, 76.80; H, 9.59; N, 3.10. M.p. = 170 °C.

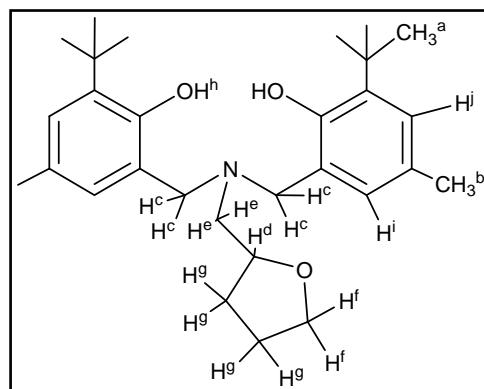

### Representative synthesis of complexes **1** to **8** – $\text{FeCl}[\text{O}_2\text{NO}]^{\text{BuMeFur}}$ (**1**):

To a methanolic slurry of recrystallized  $\text{H}_2[\text{O}_2\text{NO}]^{\text{BuMeFur}}$ , **L1H<sub>2</sub>**, (2.003 g, 4.41 mmol) was added a solution of anhydrous FeCl<sub>3</sub> (0.715 g, 4.41 mmol) in methanol resulting in an intense blue solution. To this solution was added triethylamine (890 mg, 8.82 mmol) and the resulting mixture was stirred for 4 h. Solvent was removed under vacuum, the residue was extracted with toluene and filtered

through Celite. Removal of solvent under vacuum yielded a waxy dark-blue product, which was triturated with pentane. Removal of solvents yielded 1.89 g (79%) of analytically pure product. Crystals suitable for X-ray diffraction were obtained by slow evaporation of an acetonitrile solution.

Anal. Calcd for  $C_{29}H_{41}ClFeNO_3$ : C, 64.15; H, 7.61; N, 2.58. Found C, 64.35; H, 7.82; N, 2.88. MS (MALDI-TOF)  $m/z$  (% ion): 542.0 (100,  $[M]^+$ ), 507.1 (73,  $[M-Cl]^+$ ). UV-vis ( $CH_3OH$ )  $\lambda_{max}$ , nm ( $\epsilon$ ): 616 (1670), 350 (1750).  $\mu_{eff}$  (solid, 25 °C) 5.9  $\mu_B$ . Synthesis and characterization details of complexes **2** – **8** are reported elsewhere.<sup>1</sup>

#### General method for cross-coupling catalysis runs:

Catalyst **1** (0.1 mmol, 5.0 mol%) in  $CH_2Cl_2$  (3 mL) was added to the reaction flask followed by removal of the solvent *in vacuo*. To the catalyst were added  $Et_2O$  (5 mL), alkyl halide (2.0 mmol) and dodecane (2.0 mmol as internal standard) and the solution was stirred at room temperature. Aryl Grignard (4.0 mmol) was added and the resulting mixture was stirred for 30 minutes. The reaction was quenched with HCl (aq., 2 M, 5 mL) and the organic phase was extracted with  $Et_2O$  (1 x 5 mL) and dried over  $MgSO_4$ . The mixture was analyzed by GC-MS and quantified using  $^1H$  NMR and/or GC. NMR samples were prepared by careful removal of solvent under vacuum and dissolving the residue in  $CDCl_3$ .

**1-Cyclohexyl-4-methylbenzene.**  $^1H$  NMR (500 MHz,  $CDCl_3$ ,  $\delta$ ): 7.08 (m, 4H); 2.45 (m, 1H, CH); 2.30 (s, 3H,  $CH_3$ ); 1.81 (m, 5H  $CH_2$ ); 1.27 (m, 5H  $CH_2$ ). MS (EI)  $m/z$  (% ion): 174 (80).

**1-Cyclohexyl-4-methoxybenzene.**  $^1H$  NMR (500 MHz,  $CDCl_3$ ,  $\delta$ ): 7.13 (d, 2H); 6.84 (d, 2H); 3.79 (s, 3H,  $OCH_3$ ); 2.44 (m, 1H, CH); 1.81 (m, 5H,  $CH_2$ ); 1.30 (m, 5H,  $CH_2$ ). MS (EI)  $m/z$  (% ion): 190 (70).

**1-Cyclohexyl-2-methylbenzene.**  $^1H$  NMR (500 MHz,  $CDCl_3$ ,  $\delta$ ): 7.14 (m, 4H, ArH); 2.70 (m, 1H, CH); 2.33 (s, 3H,  $CH_3$ ); 2.15 (m, 5H,  $CH_2$ ); 1.53 (m, 2H,  $CH_2$ ); 1.39 (m, 3H,  $CH_2$ ). MS (EI)  $m/z$  (% ion): 174 (80).

**1-Methyl-4-octylbenzene.**  $^1H$  NMR (500 MHz,  $CDCl_3$ ,  $\delta$ ): 7.41 (s, br, 4H, ArH); 2.71 (t, 2H,  $ArCH_2$ ); 2.45 (s, 3H,  $ArCH_3$ ); 1.74 (m, 2H,  $CH_2CH_3$ ); 1.44 (m, 10H,  $CH_2$ ); 1.03 (t, 3H,  $CH_2CH_3$ ). MS (EI)  $m/z$  (% ion): 204 (40).

**GC traces of selected cross-coupling products (dodecane internal standard  $R_t = 5.07$  min):**

**1-Cyclohexyl-2-methylbenzene,  $R_t = 6.77$  min.**

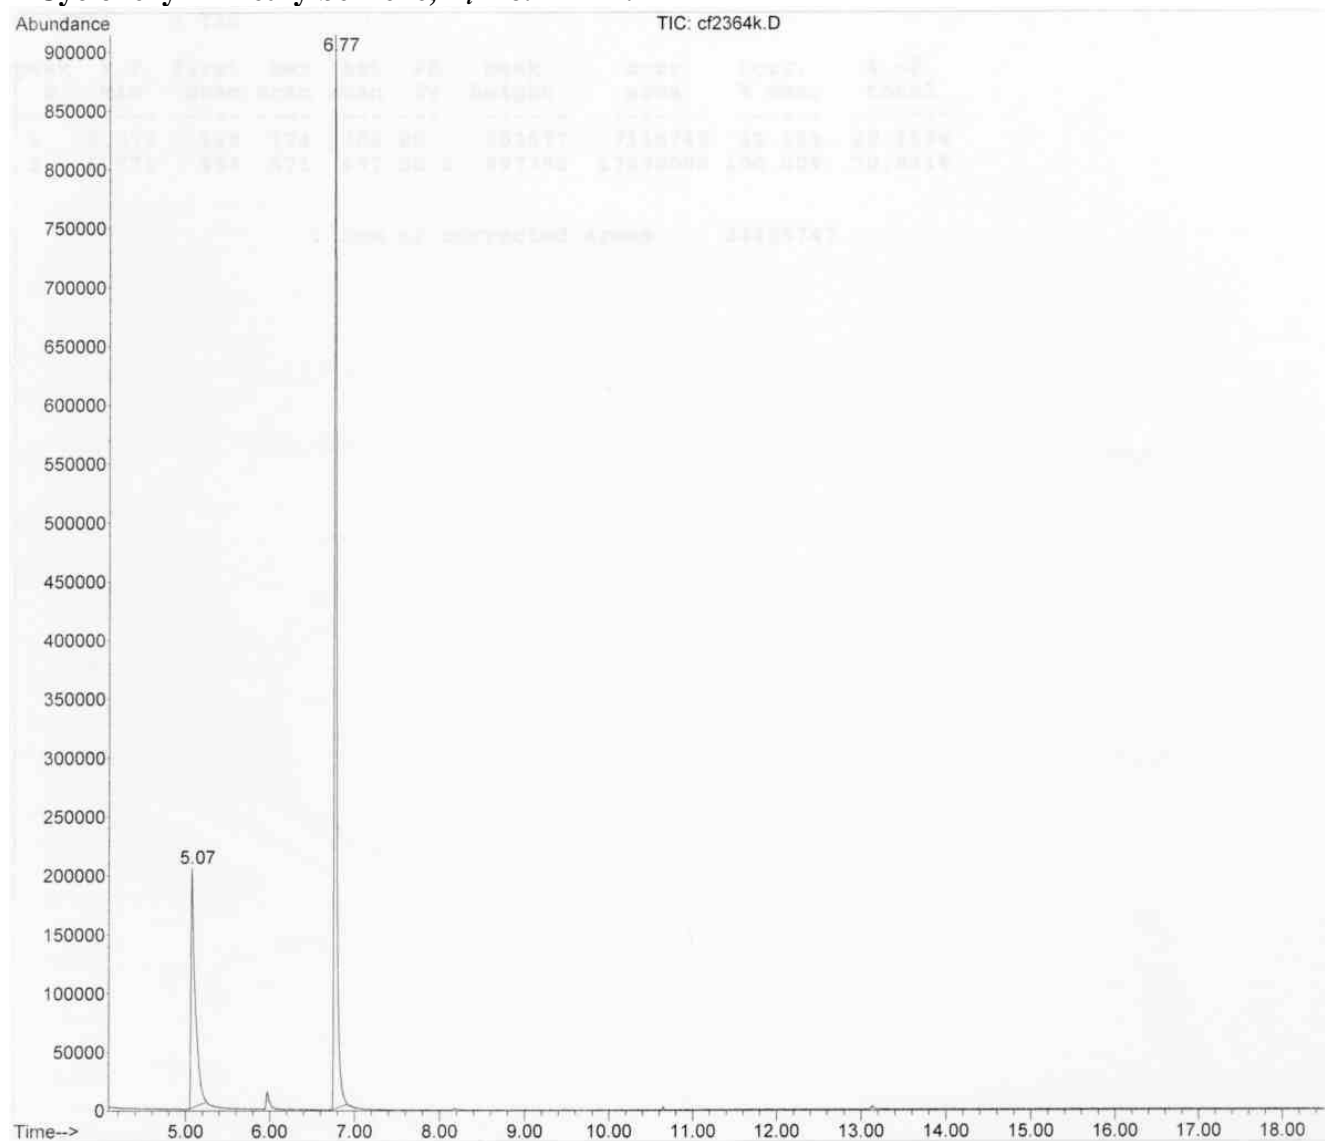

**1-Cyclohexyl-4-methoxybenzene,  $R_t = 7.81$  min.**

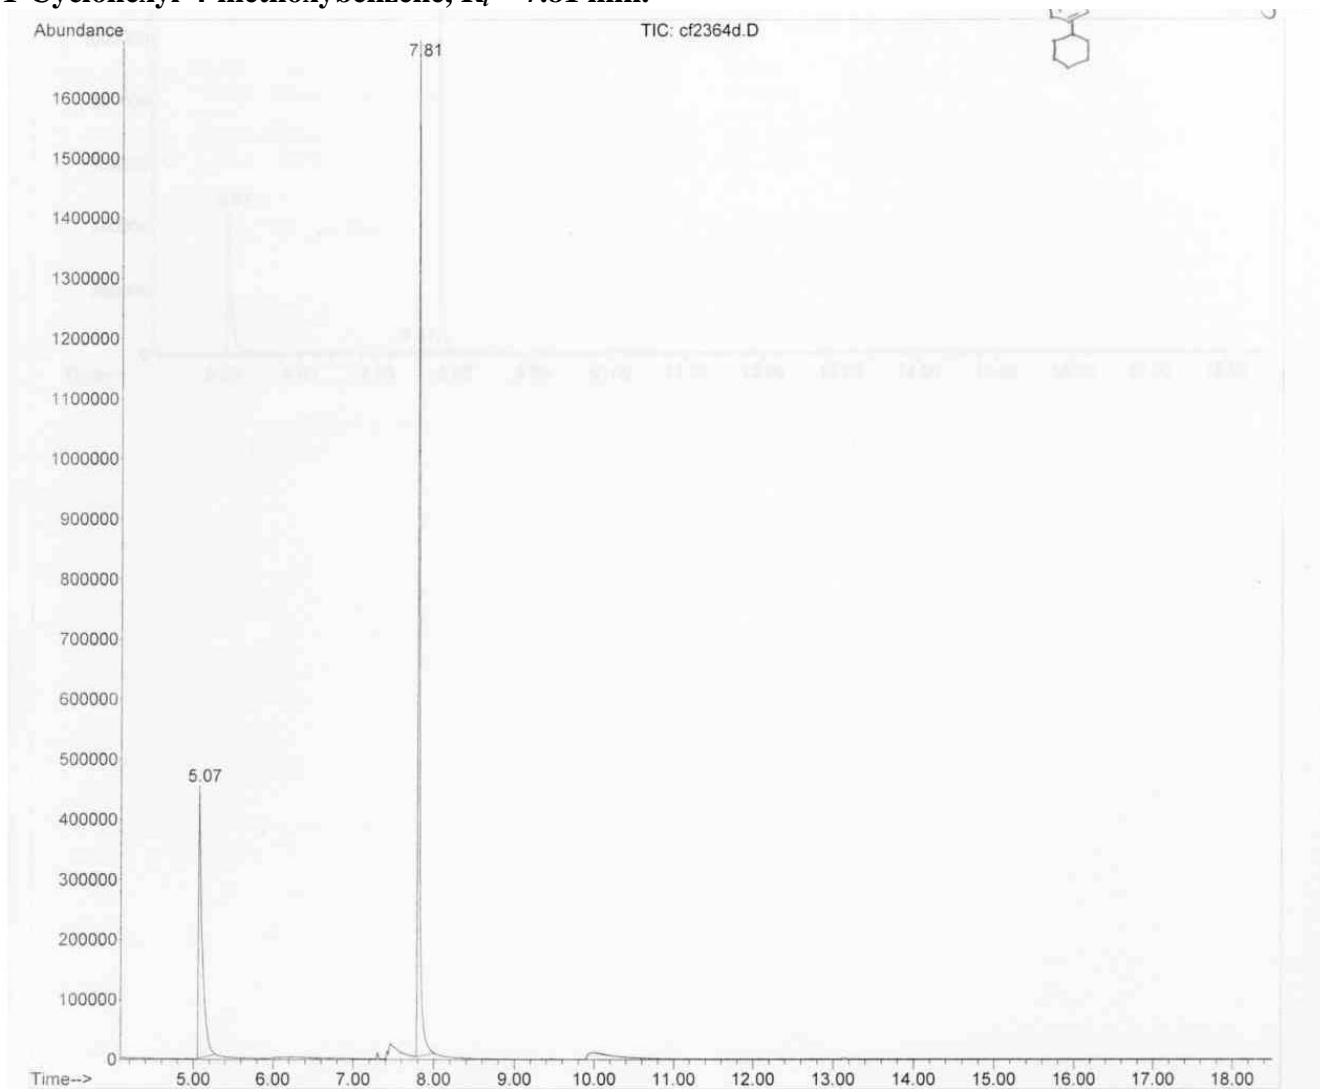

**1-Methyl-2-octylbenzene,  $R_t = 7.68$ . 2,2'-dimethylbiphenyl,  $R_t = 6.78$ .**

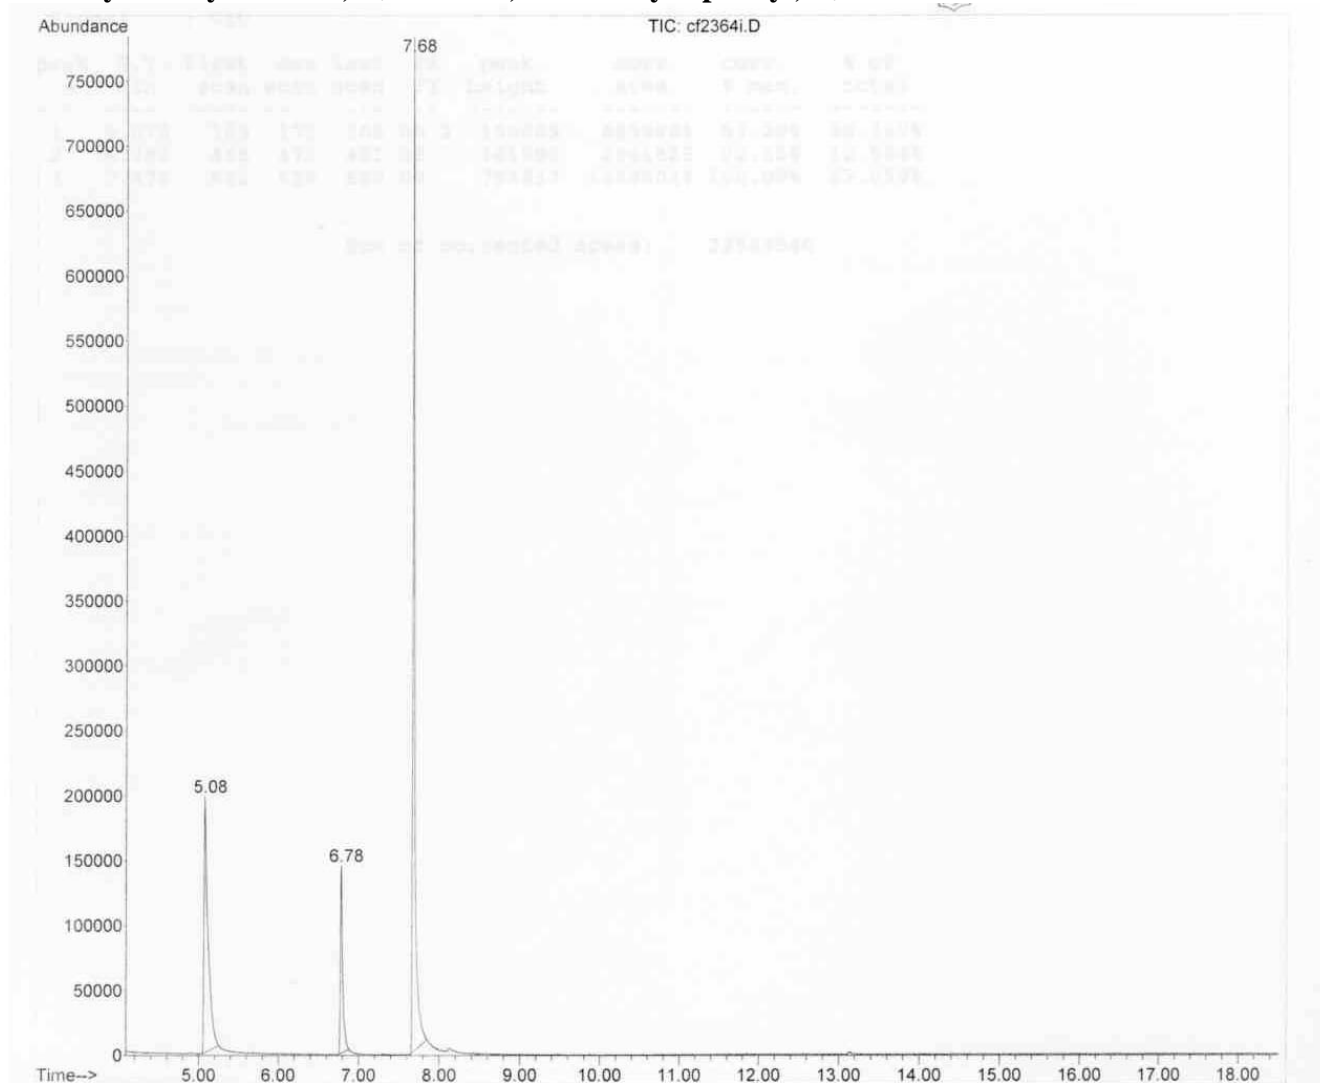

**1-methyl-2-propyl benzene,  $R_t = 4.10$ . 2,2'-dimethylbiphenyl,  $R_t = 6.78$ .**

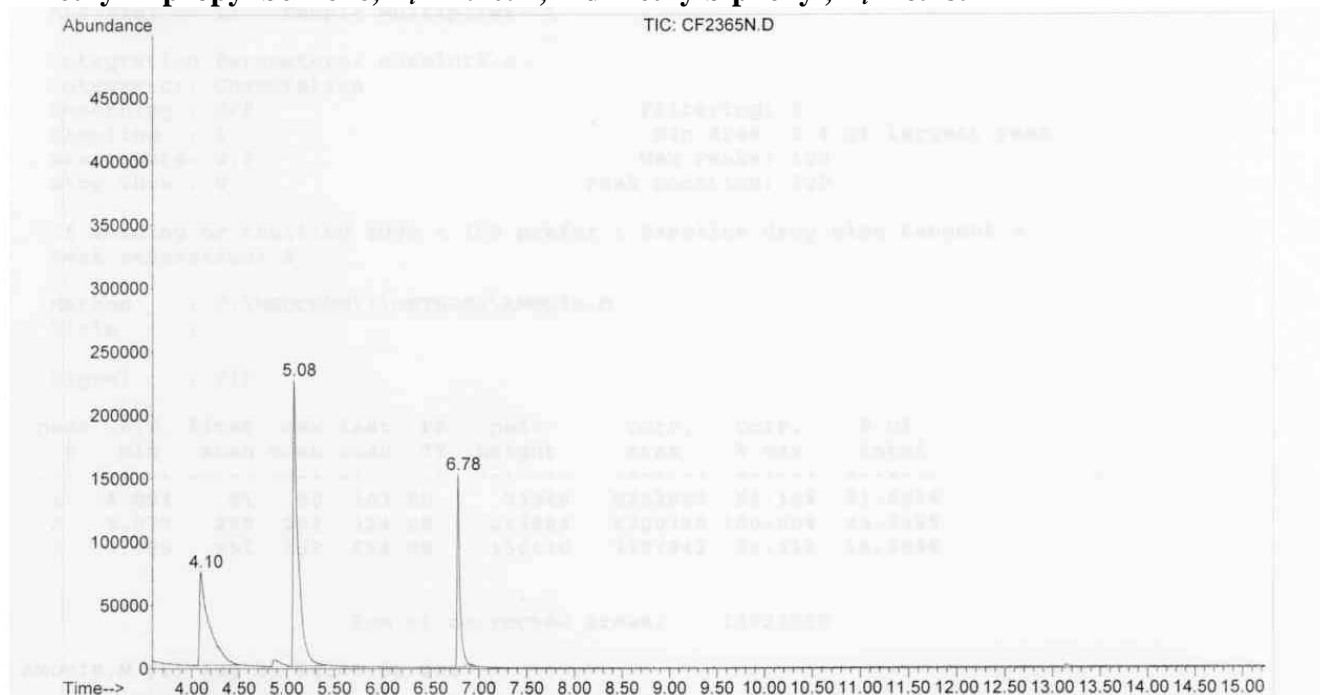

**1-sec-butyl-2-methylbenzene,  $R_t = 4.50$ . 2,2'-dimethylbiphenyl,  $R_t = 6.78$ .**

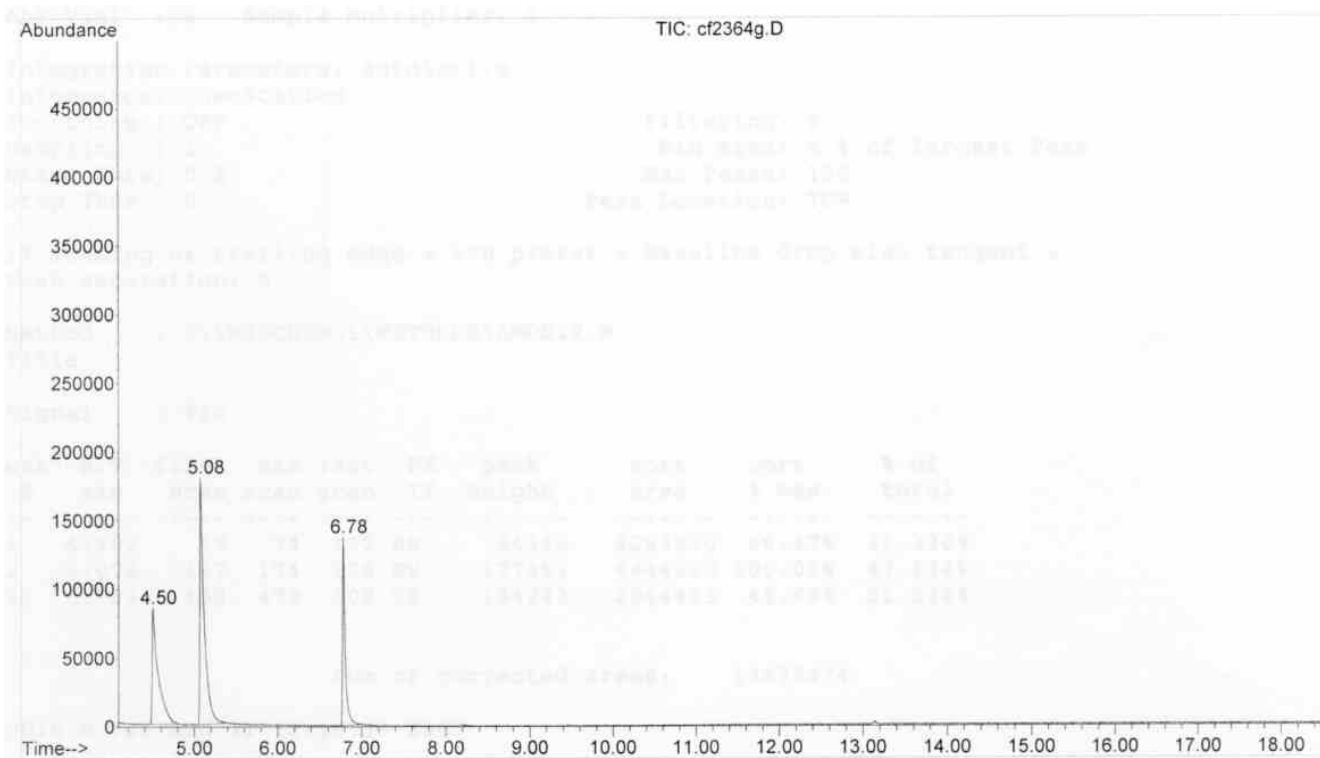

**1-methyl-2-(pentan-3-yl)benzene,  $R_t = 5.19$  min. 2,2'-dimethylbiphenyl,  $R_t = 6.78$ .**

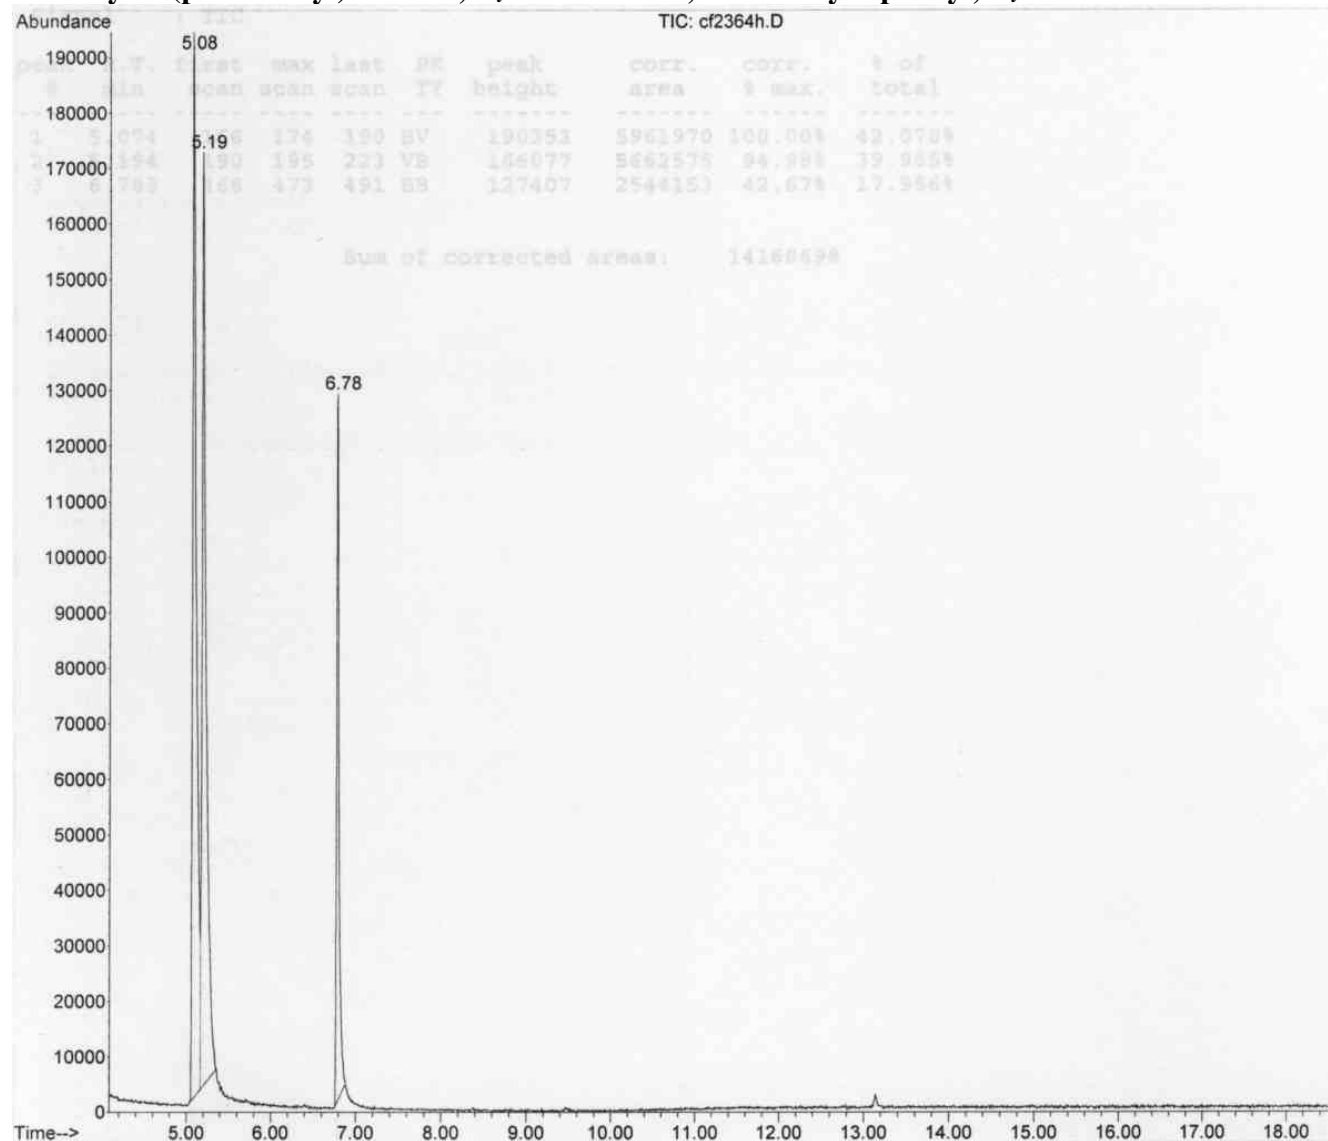

**1-methyl-2-(phenylmethyl)benzene,  $R_t = 7.49$ . 2,2'-dimethylbiphenyl,  $R_t = 6.78$ .**

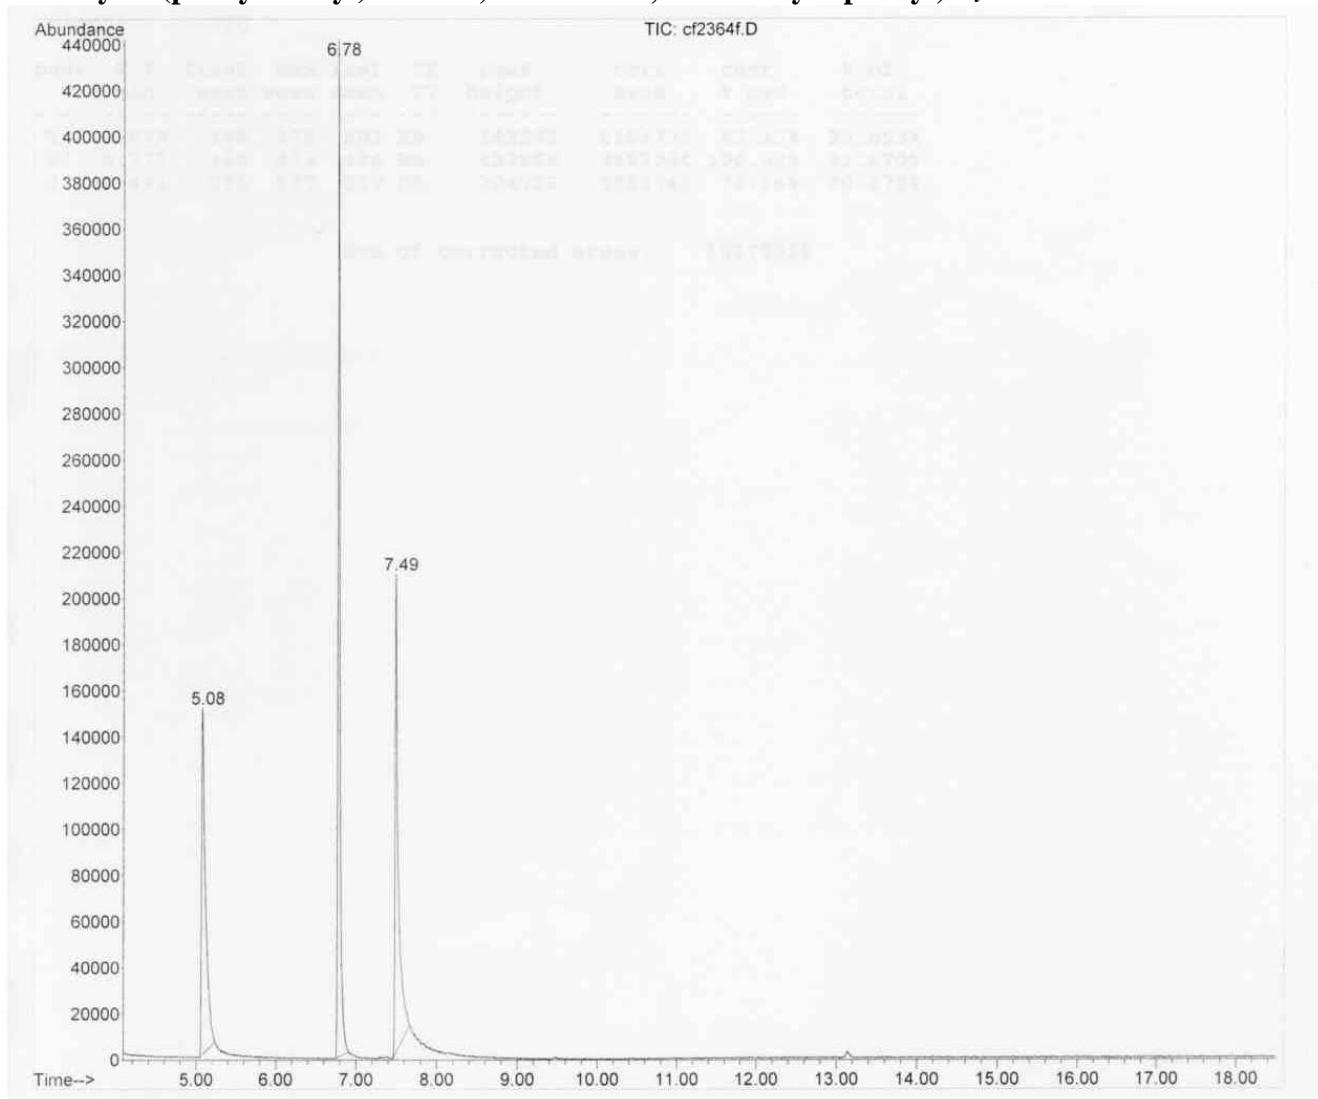

**Crystallographic Experimental:** Suitable crystals of **L1H<sub>2</sub>** and **1** were selected and mounted on glass fibers using Paratone-N oil and freezing to  $-120\text{ }^{\circ}\text{C}$ . Crystallographic data, bond lengths and bond angles for **L1H<sub>2</sub>** and **1** are given below. All measurements were made on a Rigaku Saturn CCD area detector with graphite monochromated Mo-K $\alpha$  radiation. In each case the data were processed<sup>2</sup> and corrected for Lorentz and polarization effects and absorption.<sup>3</sup> Neutral atom scattering factors for all non-hydrogen atoms were taken from the *International Tables for X-ray Crystallography*.<sup>4</sup> All structures were solved by direct methods<sup>5</sup> and expanded using Fourier techniques.<sup>6</sup> All non-hydrogen atoms were refined anisotropically. Hydrogen atoms were refined using the riding model. Anomalous dispersion effects were included in Fcalc;<sup>7</sup> the values for  $\Delta f'$  and  $\Delta f''$  were those of Creagh and McAuley.<sup>8</sup> The values for the mass attenuation coefficients are those of Creagh and Hubbell.<sup>9</sup> All calculations were performed using the CrystalStructure<sup>10,11</sup> crystallographic software package except for refinement, which was performed using SHELXL-97<sup>12</sup>.

**Crystallographic data for L1H<sub>2</sub>:** C<sub>29</sub>H<sub>43</sub>NO<sub>3</sub>,  $M = 453.66$ ,  $T = 153\text{ K}$ , colourless, prism, triclinic, P-1 (#2),  $a = 10.453(4)\text{ \AA}$ ,  $b = 11.703(4)\text{ \AA}$ ,  $c = 12.508(4)\text{ \AA}$ ,  $\alpha = 101.931(6)^{\circ}$ ,  $\beta = 107.410(5)^{\circ}$ ,  $\gamma = 104.170(7)^{\circ}$ ,  $V = 1349.3(8)\text{ \AA}^3$ ,  $Z = 2$ ,  $D_c = 1.117\text{ g cm}^{-3}$ ,  $\mu(\text{MoK}\alpha) = 0.707\text{ cm}^{-1}$ , 13994 total reflections, 6808 unique reflections,  $R_{\text{int}} = 0.019$ ,  $R [I > 2\sigma(I)] = 0.0600$ ,  $wR2 = 0.1659$ .

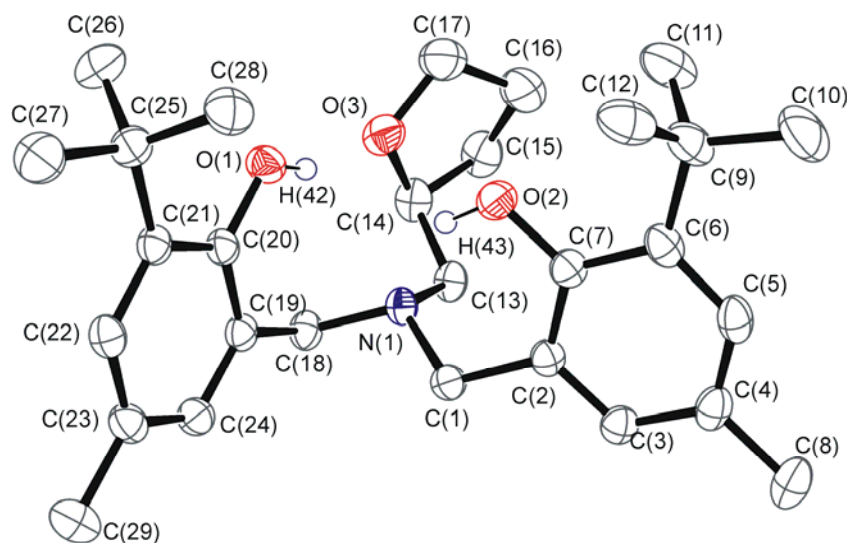

**Fig. S1** Molecular structure (ORTEP) and numbering scheme of **L1H<sub>2</sub>**. Ellipsoids are shown at 50 % probability. Except for H(42) and H(43), all hydrogen atoms have been removed.

**Table S1** Bond Lengths for (Å) **L1H<sub>2</sub>**:

|    |     |            |     |     |            |
|----|-----|------------|-----|-----|------------|
| O2 | C7  | 1.3734(17) | C9  | C11 | 1.541(2)   |
| O3 | C17 | 1.434(2)   | C13 | C14 | 1.527(2)   |
| O3 | C14 | 1.4447(19) | C14 | C15 | 1.527(2)   |
| N1 | C13 | 1.4666(17) | C15 | C16 | 1.512(3)   |
| N1 | C1  | 1.4744(17) | C16 | C17 | 1.522(3)   |
| N1 | C18 | 1.4781(16) | C18 | C19 | 1.5072(18) |
| C1 | C2  | 1.5199(18) | C19 | C24 | 1.3929(19) |
| C2 | C3  | 1.3921(19) | C19 | C20 | 1.4066(18) |
| C2 | C7  | 1.4025(18) | C20 | C21 | 1.4106(18) |
| C3 | C4  | 1.389(2)   | C21 | C22 | 1.4008(19) |
| C4 | C5  | 1.391(2)   | C21 | C25 | 1.5391(19) |
| C4 | C8  | 1.513(2)   | C22 | C23 | 1.395(2)   |
| C5 | C6  | 1.401(2)   | C23 | C24 | 1.3919(19) |
| C6 | C7  | 1.4137(19) | C23 | C29 | 1.512(2)   |
| C6 | C9  | 1.539(2)   | C25 | C27 | 1.537(2)   |
| C9 | C10 | 1.537(2)   | C25 | C26 | 1.539(2)   |
| C9 | C12 | 1.537(3)   | C25 | C28 | 1.540(2)   |

**Table S2** Bond Angles (°) for **L1H<sub>2</sub>**:

|     |    |     |            |     |     |     |            |
|-----|----|-----|------------|-----|-----|-----|------------|
| C17 | O3 | C14 | 110.45(12) | O3  | C14 | C13 | 109.89(11) |
| C13 | N1 | C1  | 111.72(11) | C15 | C14 | C13 | 112.35(13) |
| C13 | N1 | C18 | 112.02(10) | C16 | C15 | C14 | 102.83(14) |
| C1  | N1 | C18 | 110.64(10) | C15 | C16 | C17 | 101.88(15) |
| N1  | C1 | C2  | 113.53(10) | O3  | C17 | C16 | 105.83(14) |
| C3  | C2 | C7  | 119.47(12) | N1  | C18 | C19 | 112.64(10) |
| C3  | C2 | C1  | 119.23(12) | C24 | C19 | C20 | 119.43(12) |
| C7  | C2 | C1  | 121.19(12) | C24 | C19 | C18 | 120.41(12) |
| C4  | C3 | C2  | 121.31(13) | C20 | C19 | C18 | 120.14(12) |
| C3  | C4 | C5  | 118.11(13) | O1  | C20 | C19 | 121.39(11) |
| C3  | C4 | C8  | 120.53(14) | O1  | C20 | C21 | 117.88(11) |
| C5  | C4 | C8  | 121.36(13) | C19 | C20 | C21 | 120.73(12) |
| C4  | C5 | C6  | 123.32(13) | C22 | C21 | C20 | 117.12(12) |
| C5  | C6 | C7  | 116.76(13) | C22 | C21 | C25 | 121.39(12) |
| C5  | C6 | C9  | 122.00(12) | C20 | C21 | C25 | 121.46(12) |
| C7  | C6 | C9  | 121.23(13) | C23 | C22 | C21 | 123.50(12) |
| O2  | C7 | C2  | 119.94(12) | C24 | C23 | C22 | 117.53(12) |
| O2  | C7 | C6  | 119.03(12) | C24 | C23 | C29 | 121.00(13) |
| C2  | C7 | C6  | 121.02(12) | C22 | C23 | C29 | 121.47(13) |
| C10 | C9 | C12 | 107.51(14) | C23 | C24 | C19 | 121.67(12) |
| C10 | C9 | C6  | 112.10(15) | C27 | C25 | C26 | 106.91(13) |
| C12 | C9 | C6  | 109.77(13) | C27 | C25 | C21 | 111.76(12) |
| C10 | C9 | C11 | 107.10(14) | C26 | C25 | C21 | 111.26(12) |
| C12 | C9 | C11 | 110.00(15) | C27 | C25 | C28 | 107.85(12) |
| C6  | C9 | C11 | 110.28(13) | C26 | C25 | C28 | 109.69(13) |

|    |     |     |            |     |     |     |            |
|----|-----|-----|------------|-----|-----|-----|------------|
| N1 | C13 | C14 | 112.95(11) | C21 | C25 | C28 | 109.29(11) |
| O3 | C14 | C15 | 104.72(13) |     |     |     |            |

**Crystallographic data for 1:**  $C_{29}H_{41}ClFeNO_3$ ,  $M = 542.95$ , black prism, monoclinic,  $P2_1/n$  (#14)  $a = 9.7824(8)$  Å,  $b = 25.0778(19)$  Å,  $c = 12.3276(9)$  Å,  $\beta = 95.0780(19)^\circ$ ,  $V = 3012.4(4)$  Å<sup>3</sup>,  $T = 153$  K,  $Z = 4$ ,  $\mu(\text{MoK}\alpha) = 6.160$  cm<sup>-1</sup>,  $D_c = 1.197$  g cm<sup>-3</sup>, 27790 reflections measured, 8185 unique reflections ( $R_{\text{int}} = 0.049$ ),  $R [I > 2\sigma(I)] = 0.0836$ ,  $wR2 = 0.2400$ .

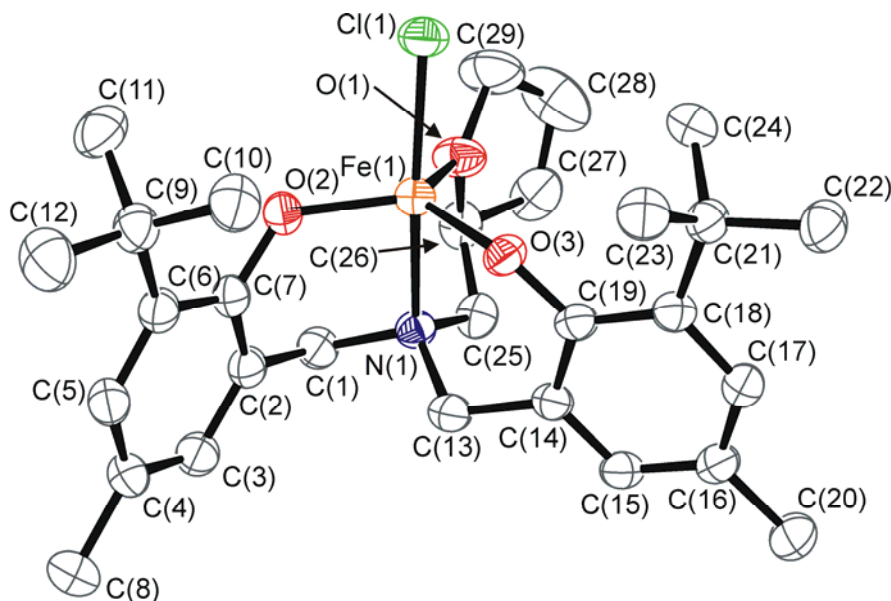

**Fig. S2** Molecular structure (ORTEP) and numbering scheme of **1**. Ellipsoids are shown at 50 % probability. All hydrogen atoms have been removed.

**Table S3** Bond Lengths for (Å) **1**:

|     |     |            |     |     |          |
|-----|-----|------------|-----|-----|----------|
| Fe1 | O3  | 1.850(2)   | C6  | C9  | 1.526(5) |
| Fe1 | O2  | 1.854(2)   | C9  | C12 | 1.531(5) |
| Fe1 | O1  | 2.074(3)   | C9  | C10 | 1.543(5) |
| Fe1 | N1  | 2.223(3)   | C9  | C11 | 1.548(6) |
| Fe1 | Cl1 | 2.2739(10) | C13 | C14 | 1.507(5) |
| O1  | C29 | 1.452(5)   | C14 | C15 | 1.395(4) |
| O1  | C26 | 1.468(5)   | C14 | C19 | 1.398(4) |
| O2  | C7  | 1.346(4)   | C15 | C16 | 1.388(5) |
| O3  | C19 | 1.352(4)   | C16 | C17 | 1.389(5) |
| N1  | C25 | 1.480(4)   | C16 | C20 | 1.508(4) |
| N1  | C13 | 1.488(4)   | C17 | C18 | 1.409(4) |
| N1  | C1  | 1.500(4)   | C18 | C19 | 1.405(4) |

|    |    |          |     |     |          |
|----|----|----------|-----|-----|----------|
| C1 | C2 | 1.509(5) | C18 | C21 | 1.530(5) |
| C2 | C3 | 1.398(5) | C21 | C24 | 1.534(5) |
| C2 | C7 | 1.402(5) | C21 | C22 | 1.540(5) |
| C3 | C4 | 1.387(5) | C21 | C23 | 1.543(5) |
| C4 | C5 | 1.388(5) | C25 | C26 | 1.493(5) |
| C4 | C8 | 1.513(5) | C26 | C27 | 1.530(5) |
| C5 | C6 | 1.398(5) | C27 | C28 | 1.499(7) |
| C6 | C7 | 1.417(5) | C28 | C29 | 1.448(7) |

**Table S4** Bond Angles (°) for **1**:

|     |     |     |            |     |     |     |          |
|-----|-----|-----|------------|-----|-----|-----|----------|
| O3  | Fe1 | O2  | 118.39(10) | C2  | C7  | C6  | 120.7(3) |
| O3  | Fe1 | O1  | 119.00(11) | C6  | C9  | C12 | 112.0(3) |
| O2  | Fe1 | O1  | 119.60(11) | C6  | C9  | C10 | 110.8(3) |
| O3  | Fe1 | N1  | 87.62(10)  | C12 | C9  | C10 | 107.5(3) |
| O2  | Fe1 | N1  | 89.37(10)  | C6  | C9  | C11 | 109.5(3) |
| O1  | Fe1 | N1  | 75.79(10)  | C12 | C9  | C11 | 107.5(3) |
| O3  | Fe1 | C11 | 100.81(8)  | C10 | C9  | C11 | 109.5(3) |
| O2  | Fe1 | C11 | 96.60(8)   | N1  | C13 | C14 | 113.4(3) |
| O1  | Fe1 | C11 | 89.98(8)   | C15 | C14 | C19 | 121.0(3) |
| N1  | Fe1 | C11 | 165.69(8)  | C15 | C14 | C13 | 120.3(3) |
| C29 | O1  | C26 | 106.2(3)   | C19 | C14 | C13 | 118.7(3) |
| C29 | O1  | Fe1 | 133.6(3)   | C16 | C15 | C14 | 120.5(3) |
| C26 | O1  | Fe1 | 120.2(2)   | C15 | C16 | C17 | 117.8(3) |
| C7  | O2  | Fe1 | 129.3(2)   | C15 | C16 | C20 | 121.2(3) |
| C19 | O3  | Fe1 | 132.0(2)   | C17 | C16 | C20 | 121.0(3) |
| C25 | N1  | C13 | 109.1(3)   | C16 | C17 | C18 | 123.7(3) |
| C25 | N1  | C1  | 110.3(3)   | C19 | C18 | C17 | 117.0(3) |
| C13 | N1  | C1  | 108.9(2)   | C19 | C18 | C21 | 121.8(3) |
| C25 | N1  | Fe1 | 109.1(2)   | C17 | C18 | C21 | 121.2(3) |
| C13 | N1  | Fe1 | 111.0(2)   | O3  | C19 | C14 | 118.9(3) |
| C1  | N1  | Fe1 | 108.41(19) | O3  | C19 | C18 | 121.1(3) |
| N1  | C1  | C2  | 112.4(3)   | C14 | C19 | C18 | 120.0(3) |
| C3  | C2  | C7  | 119.8(3)   | C18 | C21 | C24 | 109.7(3) |
| C3  | C2  | C1  | 121.1(3)   | C18 | C21 | C22 | 112.1(3) |
| C7  | C2  | C1  | 119.1(3)   | C24 | C21 | C22 | 107.4(3) |
| C4  | C3  | C2  | 121.2(3)   | C18 | C21 | C23 | 110.5(3) |
| C3  | C4  | C5  | 117.6(3)   | C24 | C21 | C23 | 110.0(3) |
| C3  | C4  | C8  | 120.8(3)   | C22 | C21 | C23 | 107.2(3) |
| C5  | C4  | C8  | 121.6(3)   | N1  | C25 | C26 | 110.1(3) |
| C4  | C5  | C6  | 124.3(3)   | O1  | C26 | C25 | 105.9(3) |
| C5  | C6  | C7  | 116.4(3)   | O1  | C26 | C27 | 105.0(3) |
| C5  | C6  | C9  | 122.1(3)   | C25 | C26 | C27 | 114.4(3) |
| C7  | C6  | C9  | 121.5(3)   | C28 | C27 | C26 | 104.5(4) |
| O2  | C7  | C2  | 118.4(3)   | C29 | C28 | C27 | 108.0(4) |
| O2  | C7  | C6  | 120.9(3)   | C28 | C29 | O1  | 106.1(4) |

## References:

- (1) Kwong, P., Fowler, C., Hasan, K., Roy Chowdhury, R., Crane, A. K., Trudel, S., Leznoff, D. B., and Kozak, C. M. *Manuscript in preparation*.
- (2) CrystalClear: Rigaku Corporation, 1999. CrystalClear Software User's Guide, Molecular Structure Corporation, (c) 2000. J. W. Pflugrath (1999) *Acta Cryst.* D55, 1718-1725.
- (3) Larson, A. C. (1970), *Crystallographic Computing*, 291-294. F. R. Ahmed, ed. Munksgaard, Copenhagen (equation 22, with V replaced by the cell volume).
- (4) Cromer, D. T. & Waber, J. T.; "International Tables for X-ray Crystallography", Vol. IV, The Kynoch Press, Birmingham, England, Table 2.2 A (1974).
- (5) SIR92: Altomare, A., Cascarano, G., Giacovazzo, C., Guagliardi, A., Burla, M., Polidori, G., and Camalli, M. (1994) *J. Appl. Cryst.*, 27, 435.
- (6) DIRDIF99: Beurskens, P. T., Admiraal, G., Beurskens, G., Bosman, W. P., de Gelder, R., Israel, R. and Smits, J. M. M. (1999). The DIRDIF-99 program system, Technical Report of the Crystallography Laboratory, University of Nijmegen, The Netherlands.
- (7) Ibers, J. A. & Hamilton, W. C.; *Acta Crystallogr.*, 17, 781 (1964).
- (8) Creagh, D. C. & McAuley, W. J.; "International Tables for Crystallography", Vol C, (A. J. C. Wilson, ed.), Kluwer Academic Publishers, Boston, Table 4.2.6.8, pages 219-222 (1992).
- (9) Creagh, D. C. & Hubbell, J. H.; "International Tables for Crystallography", Vol C, (A. J. C. Wilson, ed.), Kluwer Academic Publishers, Boston, Table 4.2.4.3, pages 200-206 (1992).
- (10) CrystalStructure 3.7.0: Crystal Structure Analysis Package, Rigaku and Rigaku/MSO (2000-2005). 9009 New Trails Dr. The Woodlands TX 77381 USA.
- (11) CRYSTALS Issue 10: Watkin, D. J., Prout, C. K., Carruthers, J. R. & Betteridge, P. W. Chemical Crystallography Laboratory, Oxford, UK. (1996)
- (12) SHELX97: Sheldrick, G. M. (1997).
